# Supplementary material for: Condensation of malononitrile with salicylaldehydes and o-aminobenzaldehydes revisited: solvent and catalyst free synthesis of 4H-chromenes and quinolines
Source: Royal Society of Chemistry journal article supplement (doi:10.1039/c2ra21849f), 2012-01-01

## Electronic Supplementary Information

### Condensation of malononitrile with salicylaldehydes and *o*-aminobenzaldehydes revisited: Solvent and catalyst free synthesis of 4*H*-chromenes and quinolines

Subrahmanya Ishwar Bhat,<sup>a</sup> Angshuman Roy Choudhury<sup>b</sup> and Darshak R. Trivedi<sup>\*a</sup>

<sup>a</sup>Supramolecular Chemistry Laboratory, Department of Chemistry, National Institute of Technology Karnataka (NITK), Srinivasnagar, Surathkal, Mangalore 575025 Karnataka, India.

Phone No : +91-824-2474000 Ext. No:3205 ; Fax: +91-824-2474033 E-mail: darshak\_rtrivedi@yahoo.co.in

<sup>b</sup>Indian Institute of Science Education and Research, Mohali, Sector 81, S. A. S. Nagar, Manauli PO, Punjab, India 140306

## Contents

### Table of contents

1. Fig S1: IR spectra of reaction monitored (Complete)
2. Fig S2: IR spectra of reaction monitored (expansion range: 2100-3500 cm<sup>-1</sup>)
3. Characterization data
4. Copies of <sup>1</sup>H and <sup>13</sup>C NMR Spectra

# 1. Fig. S1: IR spectra of reaction of salicylaldehyde with malononitrile under neat condition at room temperature (Complete)

The spectra were measured every 3 min for 3 h using neat samples

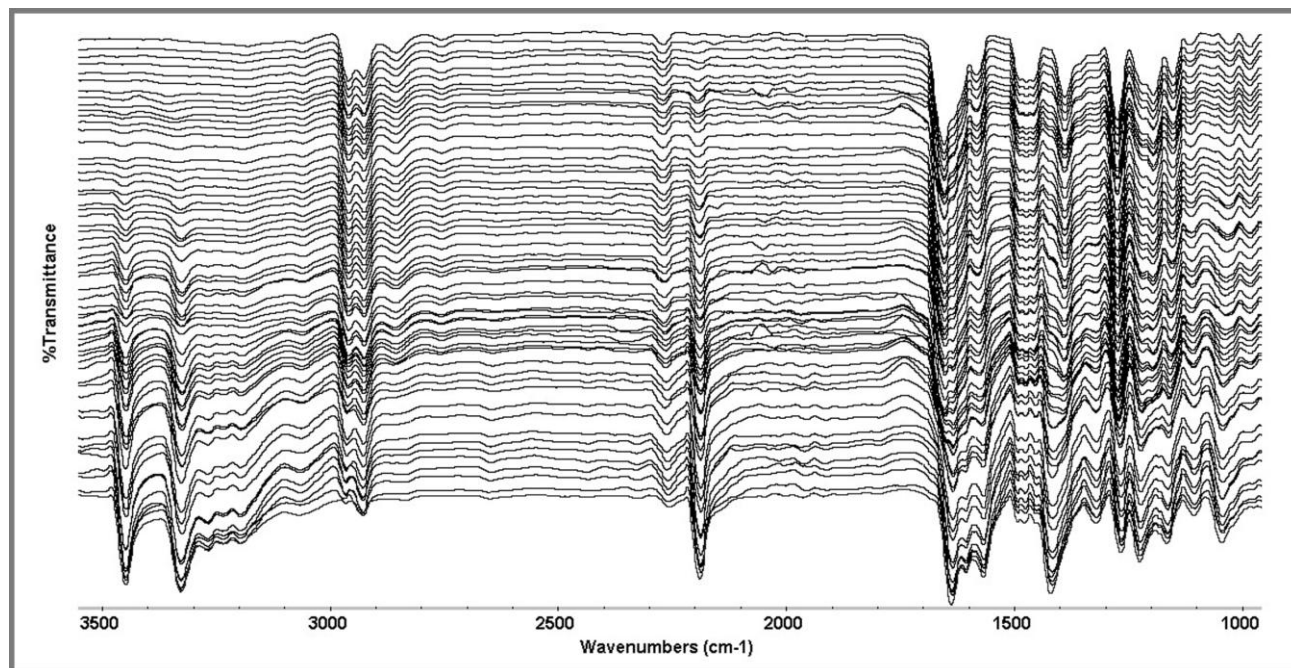

## 2. Fig. S2: IR spectra of reaction of salicylaldehyde with malononitrile (Expansion range: 2100-3500 range)

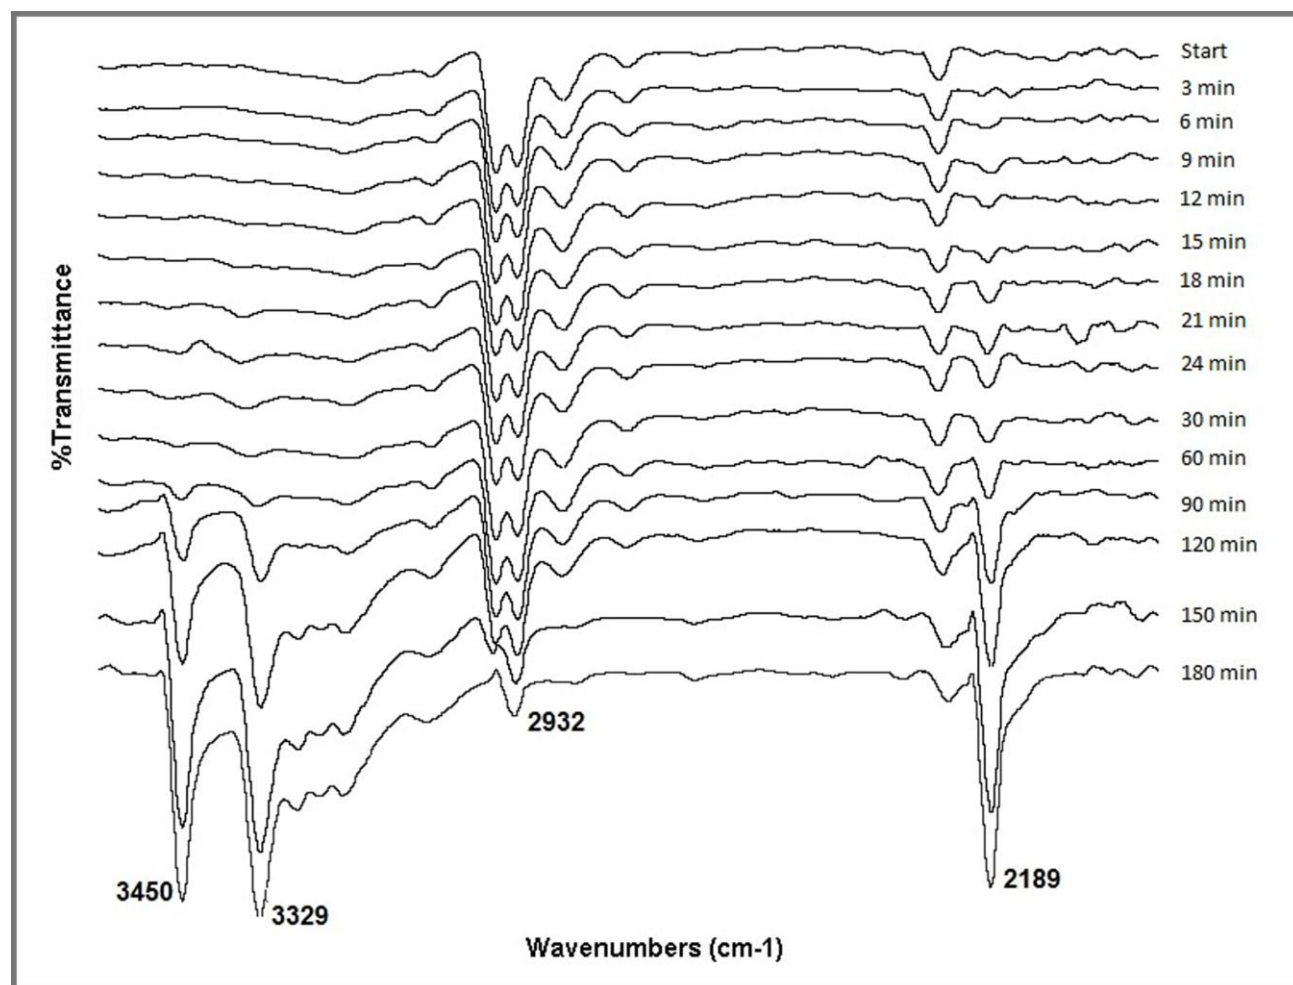

### 3. Characterization data

#### 3a: (2-amino-3-cyano-4*H*-chromen-4-yl)malononitrile<sup>1,2,3,4</sup>

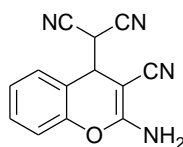

White solid; mp: 151~153 °C (lit. 150-153°C)<sup>5</sup>; IR (Neat, cm<sup>-1</sup>): 3448, 3326, 2929, 2239, 2188, 1635, 1604, 1567, 1417, 1265, 1223, 1043; <sup>1</sup>HNMR(500MHz, DMSO-*d*<sub>6</sub>) δ: 4.59(d, 1H, *J* = 4Hz), 5.07(d, 1H, *J* = 4Hz), 7.14(dd, 1H, *J*<sub>1</sub> = 8.5Hz, *J*<sub>2</sub> = 0.9Hz), 7.27(dt, 1H, *J*<sub>1</sub> = 7.5Hz, *J*<sub>2</sub> = 0.9Hz), 7.43-7.45(m, 1H), 7.47-7.49(m, 1H), 7.53(s, 2H); ESI MS (*m/z*) = 235.2 (M-H)<sup>-</sup>.

#### 3b: (2-amino-3-cyano-8-methoxy-4*H*-chromen-4-yl)malononitrile<sup>1,2,3,4</sup>

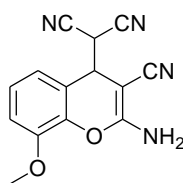

White solid; mp: 160~162 °C; IR (Neat, cm<sup>-1</sup>): 3459, 3352, 2915, 2242, 2190, 1641, 1581, 1483, 1415, 1320, 1275, 1216, 1083; <sup>1</sup>HNMR(500MHz, DMSO-*d*<sub>6</sub>) δ: 3.84(s, 3H), 4.57(d, 1H, *J* = 3Hz), 5.05(d, 1H, 3Hz), 7.00(d, 1H, *J* = 7.5Hz), 7.12(d, 1H, *J* = 8Hz), 7.19-7.22(m, 1H), 7.54(s, 2H).

#### 3c: (2-amino-3-cyano-7-methoxy-4*H*-chromen-4-yl)malononitrile

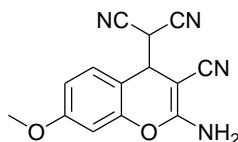

White solid; mp: 149~151 °C; IR (Neat, cm<sup>-1</sup>): 3409, 3332, 2956, 2242, 2186, 1645, 1613, 1419, 1293, 1120, 1024; <sup>1</sup>HNMR(500MHz, DMSO-*d*<sub>6</sub>) δ: 3.79(s, 3H), 4.50(d, 1H, *J* = 4Hz), 5.01(d, 1H, *J* = 4Hz), 6.65(d, 1H, *J* = 2.5Hz), 6.87(dd, 1H, *J*<sub>1</sub> = 8.5Hz, *J*<sub>2</sub> = 3Hz), 7.38(d, 1H, *J* = 8.5Hz), 7.49(s, 2H); <sup>13</sup>C NMR (125.75 MHz, DMSO-*d*<sub>6</sub>) δ: 34.4, 38.7, 57.4, 103.2, 111.6, 113.5, 114.9, 115.1, 121.3, 131.5, 152.5, 162.2, 165.2; ESI MS (*m/z*) = 267.2(M+H)<sup>+</sup>; Anal. Calcd for C<sub>14</sub>H<sub>10</sub>N<sub>4</sub>O<sub>2</sub>: C, 63.15; H, 3.79; N, 21.04, Found: C, 63.26; H, 3.88; N, 21.22.

#### 3d: (2-amino-3-cyano-6-methoxy-4*H*-chromen-4-yl)malononitrile<sup>4</sup>

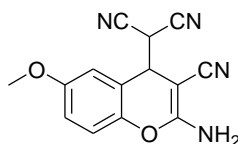

White solid; mp: 144~146 °C; IR (Neat, cm<sup>-1</sup>): 3395, 3335, 2260, 2182, 1654, 1582, 1499, 1425, 1211, 1033; <sup>1</sup>HNMR(500MHz, DMSO-*d*<sub>6</sub>) δ: 3.76(s, 3H), 4.54(d, 1H, *J* = 4Hz), 5.10(d, 1H, *J* = 3.5Hz), 6.98(dd, 1H, *J*<sub>1</sub> = 3Hz, *J*<sub>2</sub> = 9Hz), 7.06-7.08(m, 2H), 7.45(s, 2H).

**3e: (2-amino-3-cyano-8-ethoxy-4H-chromen-4-yl)malononitrile**

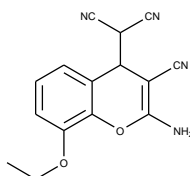

White solid; mp: 141~143 °C; IR (Neat,  $\text{cm}^{-1}$ ): 3469, 3348, 2989, 2945, 2895, 2254, 2190, 1640, 1576, 1480, 1406, 1320, 1275, 1199, 1078;  $^1\text{H}$ NMR(500MHz,  $\text{DMSO-}d_6$ )  $\delta$ : 1.36(t, 3H,  $J = 7\text{Hz}$ ), 4.09-4.16(m, 2H), 4.56(d, 1H,  $J = 4\text{Hz}$ ), 5.04(d, 1H, 4Hz), 7.00(dd, 1H,  $J_1 = 8\text{Hz}$ ,  $J_2 = 1\text{Hz}$ ), 7.10-7.12(m, 1H), 7.18(t, 1H,  $J = 8\text{Hz}$ ), 7.5(s, 2H);  $^{13}\text{C}$  NMR (100.6 MHz,  $\text{DMSO-}d_6$ )  $\delta$ : 15.0, 32.8, 37.8, 49.4, 64.9, 113.4, 113.6, 114.5, 119.4, 119.8, 120.2, 125.4, 139.9, 146.8, 163.8; ESI MS ( $m/z$ ) = 281.2 ( $\text{M}+\text{H}$ ) $^+$ ; Anal. Calcd for  $\text{C}_{15}\text{H}_{12}\text{N}_4\text{O}_2$ : C, 64.28; H, 4.32; N, 19.99, Found: C, 64.37; H, 4.37; N, 20.06.

**3f: (2-amino-6-chloro-3-cyano-4H-chromen-4-yl)malononitrile<sup>4</sup>**

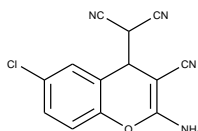

White solid; mp: 152~154 °C (lit. 151-154°C)<sup>4</sup>; IR (Neat,  $\text{cm}^{-1}$ ): 3438, 3327, 2882, 2239, 2189, 1636, 1601, 1567, 1420, 1262, 1227, 1035;  $^1\text{H}$ NMR(500MHz,  $\text{DMSO-}d_6$ )  $\delta$ : 4.62(d, 1H,  $J = 3.5\text{Hz}$ ), 5.15(d, 1H,  $J = 3.5\text{Hz}$ ), 7.18(d, 1H,  $J = 8.5\text{Hz}$ ), 7.48(dd, 1H,  $J_1 = 8.5\text{Hz}$ ,  $J_2 = 2.5\text{Hz}$ ), 7.58(d, 1H, 2.5Hz), 7.61(s, 2H).

**3g: (2-amino-3-cyano-6-nitro-4H-chromen-4-yl)malononitrile<sup>3,4</sup>**

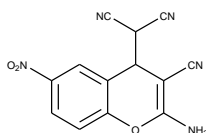

White solid; mp: 179~181 °C (lit. 180-181°C)<sup>4</sup>; IR (Neat,  $\text{cm}^{-1}$ ): 3403, 3316, 2901, 2256, 2195, 1654, 1596, 1521, 1428, 1344, 1251, 1089, 1036;  $^1\text{H}$ NMR(500MHz,  $\text{DMSO-}d_6$ )  $\delta$ : 4.81(d, 1H,  $J = 4\text{Hz}$ ), 5.23(d, 1H,  $J = 4\text{Hz}$ ), 7.40(d, 1H,  $J = 9\text{Hz}$ ), 7.81(s, 2H), 8.30(dd, 1H,  $J_1 = 9\text{Hz}$ ,  $J_2 = 2.5\text{Hz}$ ), 8.53(d, 1H,  $J = 2.5\text{Hz}$ ).

**3h: (2-amino-3-cyano-8-methoxy-6-nitro-4H-chromen-4-yl)malononitrile**

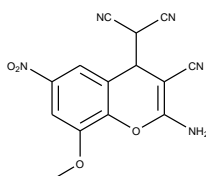

White solid; mp: 189~191 °C; IR (Neat,  $\text{cm}^{-1}$ ): 3442, 3339, 2871, 2254, 2191, 1638, 1577, 1521, 1429, 1347, 1230, 1098;  $^1\text{H}$ NMR(500MHz,  $\text{DMSO-}d_6$ )  $\delta$ : 4.00(s, 3H), 4.77(d, 1H,  $J = 3.5\text{Hz}$ ), 5.21(d, 1H,  $J = 3.5\text{Hz}$ ), 7.82(s, 2H), 7.91(d, 1H,  $J = 2.5\text{Hz}$ ), 8.10(d, 1H,  $J = 3\text{Hz}$ );  $^{13}\text{C}$  NMR (100.6 MHz,  $\text{DMSO-}d_6$ )  $\delta$ : 32.8, 37.4, 49.1, 57.2, 108.1, 113.1, 113.2, 116.5, 119.2, 119.8, 144.1, 144.4,

148.2, 163.1; ESI MS ( $m/z$ ) = 312.2( $M+H$ )<sup>+</sup>; Anal. Calcd for C<sub>14</sub>H<sub>9</sub>N<sub>5</sub>O<sub>4</sub>: C, 54.02; H, 2.91; N, 22.50, Found: C, 53.96; H, 2.97; N, 22.63.

**3i: (2-amino-3-cyano-6,8-dinitro-4H-chromen-4-yl)malononitrile**

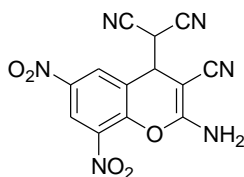

Light brown solid; mp: 188~190 °C; IR (Neat, cm<sup>-1</sup>): 3406, 3321, 2900, 2257, 2199, 1645, 1528, 1419, 1339, 1260, 1216, 1092; <sup>1</sup>HNMR(500MHz, DMSO-*d*<sub>6</sub>) δ: 4.92(d, 1H, *J* = 4Hz), 5.29(d, 1H, *J* = 4Hz), 8.02(s, 2H), 8.78(d, 1H, *J* = 3Hz), 8.89(d, 1H, *J* = 3Hz); <sup>13</sup>C NMR (100.6 MHz, DMSO-*d*<sub>6</sub>) δ:32.6, 37.2, 49.3, 112.8, 113.0, 118.6, 121.9, 122.5, 129.2, 138.4, 142.9, 146.9, 162.3; ESI MS ( $m/z$ ) = 327( $M+H$ )<sup>+</sup>; Anal. Calcd for C<sub>13</sub>H<sub>6</sub>N<sub>6</sub>O<sub>5</sub>: C, 47.86; H, 1.85; N, 25.76, Found: C, 48.04; H, 1.89; N, 25.89.

**3j: (2-amino-8-bromo-6-chloro-3-cyano-4H-chromene-4-yl)malononitrile**

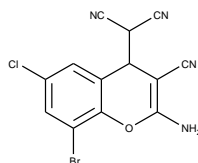

White solid; mp: 173~175 °C; IR (Neat, cm<sup>-1</sup>): 3435, 3334, 2891, 2256, 2189, 1649, 1596, 1563, 1415, 1306, 1245, 1169, 1025; <sup>1</sup>HNMR(500MHz, DMSO-*d*<sub>6</sub>) δ: 4.67(d, 1H, *J* = 4Hz), 5.17(d, 1H, *J* = 4.5Hz), 7.60(d, 1H, *J* = 2Hz), 7.75(s, 2H), 7.90(d, 1H, *J* = 2.5Hz); <sup>13</sup>C NMR (100.6 MHz, DMSO-*d*<sub>6</sub>) δ: 32.7, 37.7, 49.3, 111.1, 113.1, 113.2, 119.2, 121.8, 128.6, 129.4, 133.3, 146.3, 163.4; ESI MS ( $m/z$ ) = 350.1 ( $M+H$ )<sup>+</sup>; Anal. Calcd for C<sub>13</sub>H<sub>6</sub>BrClN<sub>4</sub>O: C, 44.67; H, 1.73; N, 16.03, Found: C, 44.72; H, 1.79; N, 16.19.

**3k: (2-amino-3-cyano-6,8-diiodo-4H-chromen-4-yl)malononitrile**

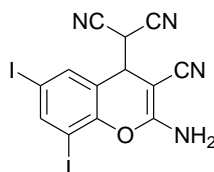

White solid; mp: 197~199 °C; IR (Neat, cm<sup>-1</sup>): 3410, 3322, 2888, 2255, 2195, 1648, 1594, 1547, 1423, 1245, 1160, 1022; <sup>1</sup>HNMR(500MHz, DMSO-*d*<sub>6</sub>) δ: 4.59(d, 1H, *J* = 4Hz), 5.13(d, 1H, *J* = 4Hz), 7.69(s, 2H), 7.82(s, 1H), 8.2(s, 1H); <sup>13</sup>C NMR (100.6 MHz, DMSO-*d*<sub>6</sub>) δ: 32.8, 37.4, 49.5, 87.3, 90.2, 113.1, 113.3, 119.2, 121.5, 137.8, 146.9, 149.9; ESI MS ( $m/z$ ) = 489( $M+H$ )<sup>+</sup>; Anal. Calcd for C<sub>13</sub>H<sub>6</sub>I<sub>2</sub>N<sub>4</sub>O: C, 31.99; H, 1.24; N, 11.48, Found: C, 32.08; H, 1.32; N, 11.57.

**4a: 2-amino-6-chloro-3-quinolinecarbonitrile**

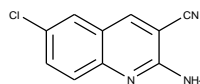

Pale yellow solid; mp: 311~313 °C; IR (Neat,  $\text{cm}^{-1}$ ): 3432, 3364, 2221, 1653, 1605, 1550, 1476, 1254, 1195;  $^1\text{H}$ NMR(500MHz,  $\text{DMSO-}d_6$ )  $\delta$ : 6.71(s, 2H), 6.79(d, 1H,  $J = 9\text{Hz}$ ), 7.32(dd, 1H,  $J_1 = 9\text{Hz}$ ,  $J_2 = 2\text{Hz}$ ), 7.77(d, 1H,  $J = 2.5\text{Hz}$ ), 8.31(s, 1H,);  $^{13}\text{C}$  NMR (125.75 MHz,  $\text{DMSO-}d_6$ )  $\delta$ : 97.5, 118.1, 123.4, 128.4, 128.8, 129.4, 134.8, 146.5, 149.6, 157.9; ESI MS ( $m/z$ ) = 204.1( $\text{M}+\text{H}$ ) $^+$ ; Anal. Calcd for  $\text{C}_{10}\text{H}_6\text{ClN}_3$ : C, 58.98; H, 2.97; N, 20.64, Found: C, 59.12; H, 3.08; N, 20.77.

#### 4b: 2-amino-6,8-dibromo-3-quinolinecarbonitrile

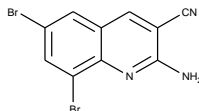

Pale yellow solid; mp: 314~316 °C; IR (Neat,  $\text{cm}^{-1}$ ): 3476, 3308, 2219, 1645, 1541, 1458, 1185;  $^1\text{H}$ NMR(500MHz,  $\text{DMSO-}d_6$ )  $\delta$ : 7.42(s, 2H), 8.03(d, 1H,  $J = 1.5\text{Hz}$ ), 8.17(d, 1H,  $J = 2\text{Hz}$ ), 8.69(s, 1H);  $^{13}\text{C}$  NMR (100.6 MHz,  $\text{DMSO-}d_6$ )  $\delta$ : 114.1, 116.2, 121.7, 123.2, 130.7, 138.1, 145.4, 145.9, 156.8; ESI MS ( $m/z$ ) = 328 ( $\text{M}+\text{H}$ ) $^+$ ; Anal. Calcd for  $\text{C}_{10}\text{H}_5\text{Br}_2\text{N}_3$ : C, 36.73; H, 1.54; N, 12.85, Found: C, 36.77; H, 1.52; N, 12.92.

#### 4c: 2-amino-1,8-naphthyridine-3-carbonitrile

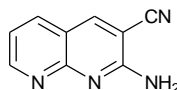

Pale yellow solid; mp: 279~280 °C; IR (Neat,  $\text{cm}^{-1}$ ): 3385, 3332, 2205, 1657, 1601, 1550, 1196;  $^1\text{H}$ NMR(500MHz,  $\text{DMSO-}d_6$ )  $\delta$ : 7.30(dd, 1H,  $J_1 = 8\text{Hz}$ ,  $J_2 = 4\text{Hz}$ ), 7.39(s, 2H), 8.18(dd, 1H,  $J_1 = 8\text{Hz}$ ,  $J_2 = 2\text{Hz}$ ), 8.76(s, 1H), 8.86(dd, 1H,  $J_1 = 4\text{Hz}$ ,  $J_2 = 2\text{Hz}$ );  $^{13}\text{C}$  NMR (125.75 MHz,  $\text{DMSO-}d_6$ )  $\delta$ : 97.4, 117.2, 117.9, 120.7, 139.6, 148.7, 157.8, 158.8, 159.9; Anal. Calcd for  $\text{C}_9\text{H}_6\text{N}_4$ : C, 63.52; H, 3.55; N, 32.92, Found: C, 63.58; H, 3.63; N, 33.02.

- (1) C. N. O'Callaghan, T. B. H. McMurry and J. E. O'Brien, *J. Chem. Soc. Perkin Trans. I*, 1995, 417-420.
- (2) M. Costa, F. Areias, L. Abrunhosa, A. Venancio, and F. Proencua *J. Org. Chem*, 2008, **73**, 1954-1962.
- (3) J. S. Yadav, B. V. S. Reddy, M. K. Gupta, I. Prathap, and S.K. Pandey, *Catal. Commun.*, 2007, **8**, 2208–2211.
- (4) R. G. Vaghei, Z. T. Semiromi and R. K. Nami, *J. Braz. Chem. Soc.*, 2011, **22**, 905-909.
- (5) J. F. Roudier and A. Foucaud, *Synthesis*, 1984, 159.

## 4. Copies of $^1\text{H}$ and $^{13}\text{C}$ NMR Spectra

### $^1\text{H}$ NMR of Compound 3a

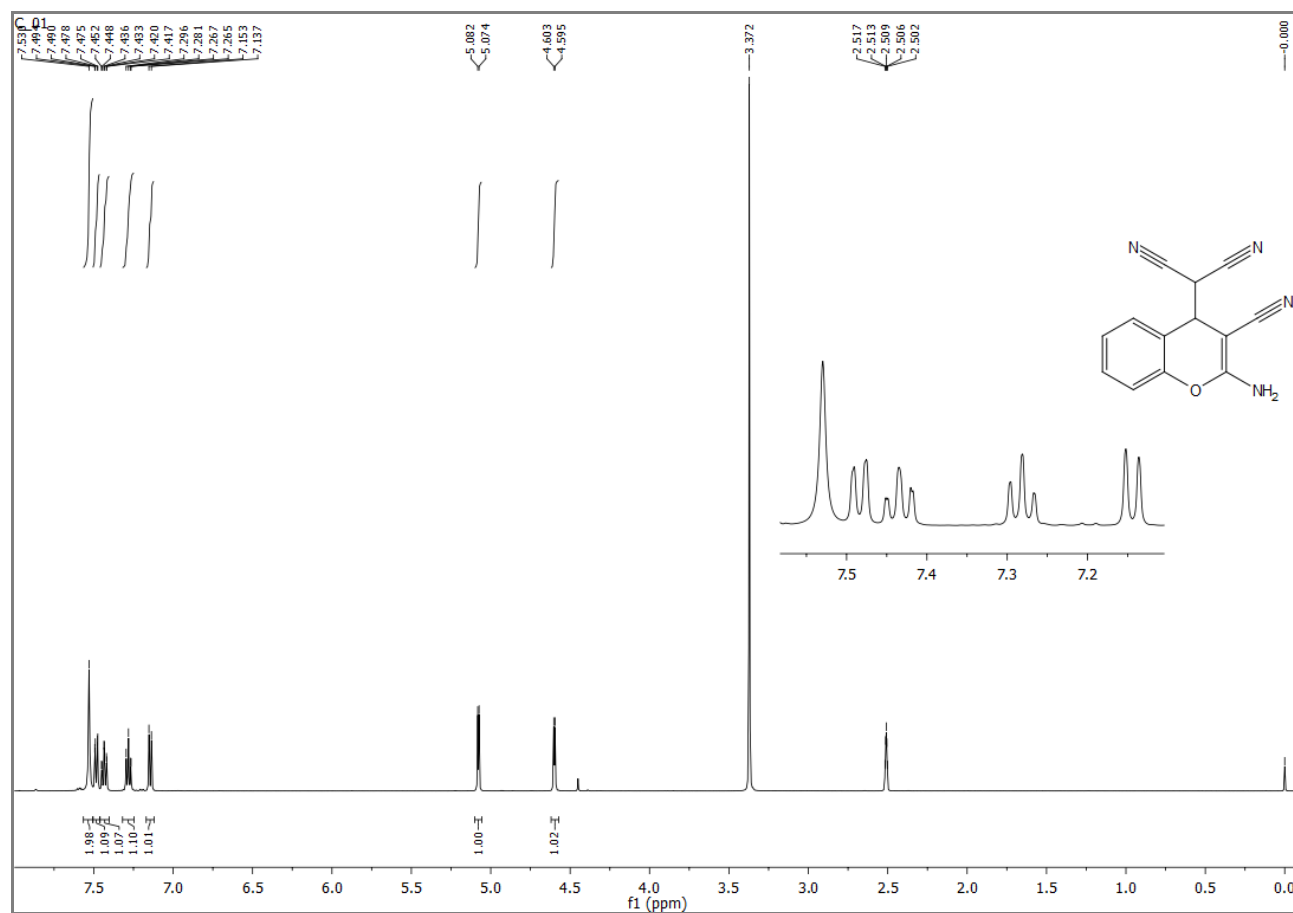



### <sup>1</sup>H NMR of Compound 3c

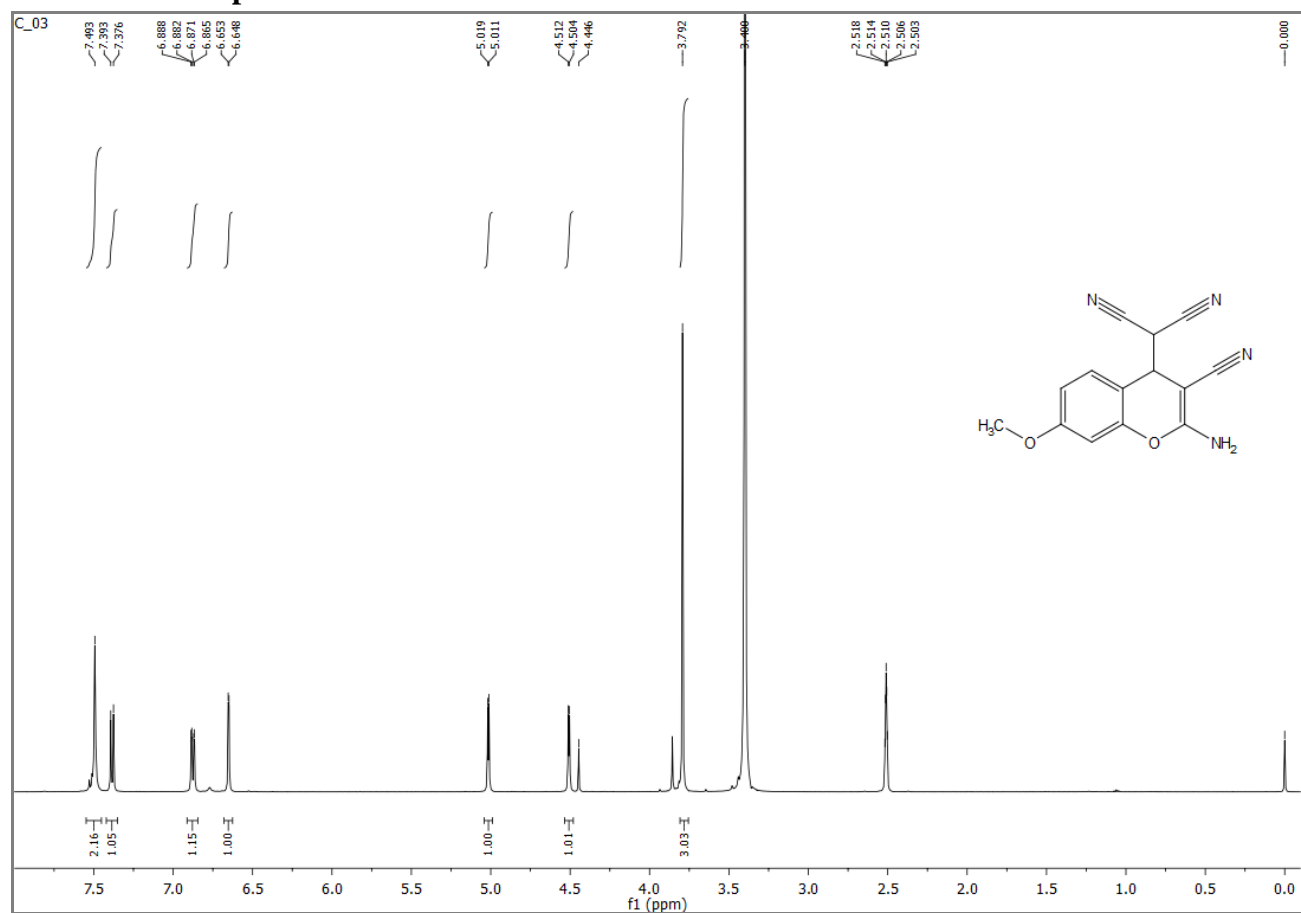

### <sup>13</sup>C NMR of Compound 3c

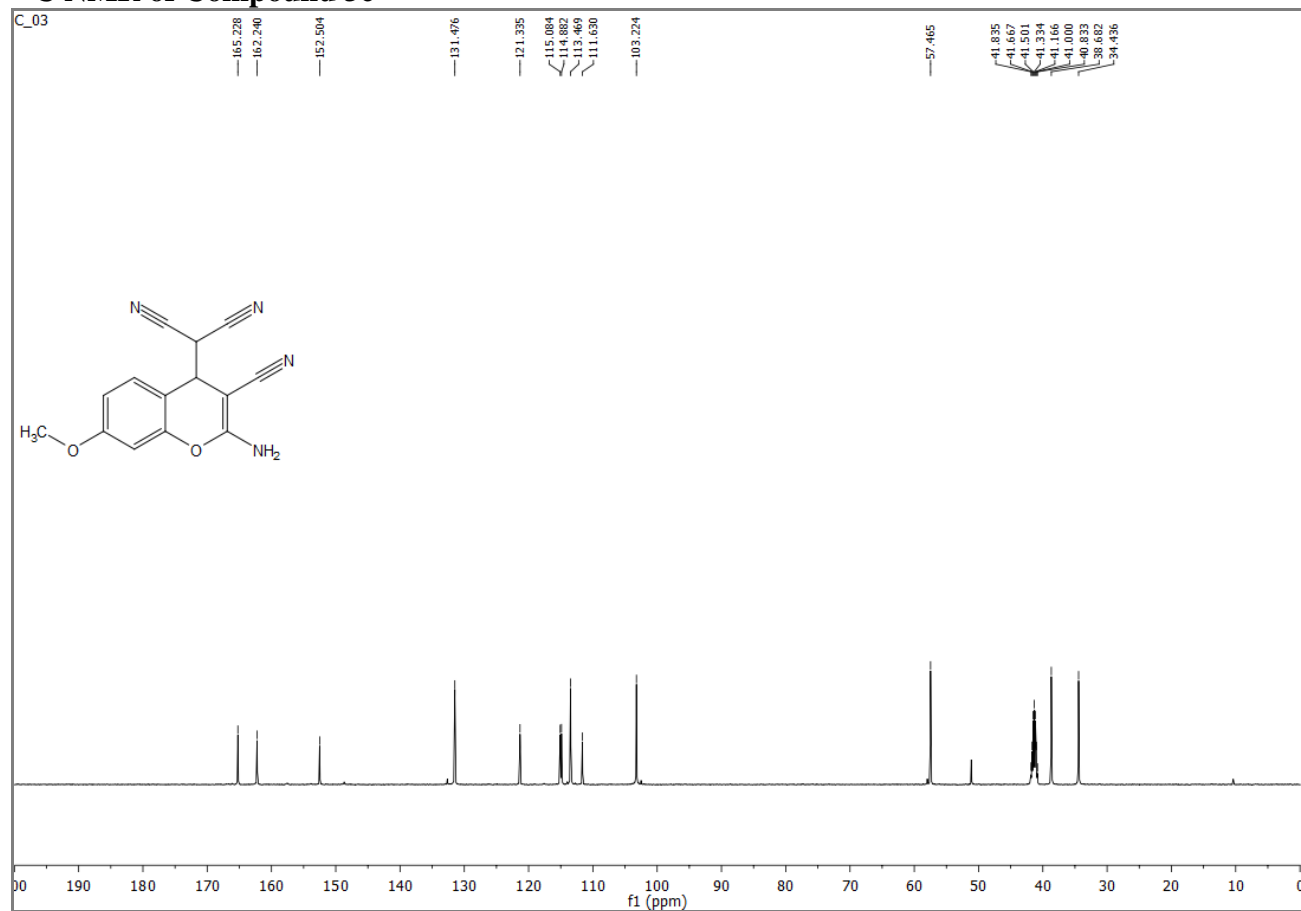

### <sup>1</sup>H NMR of Compound 3d

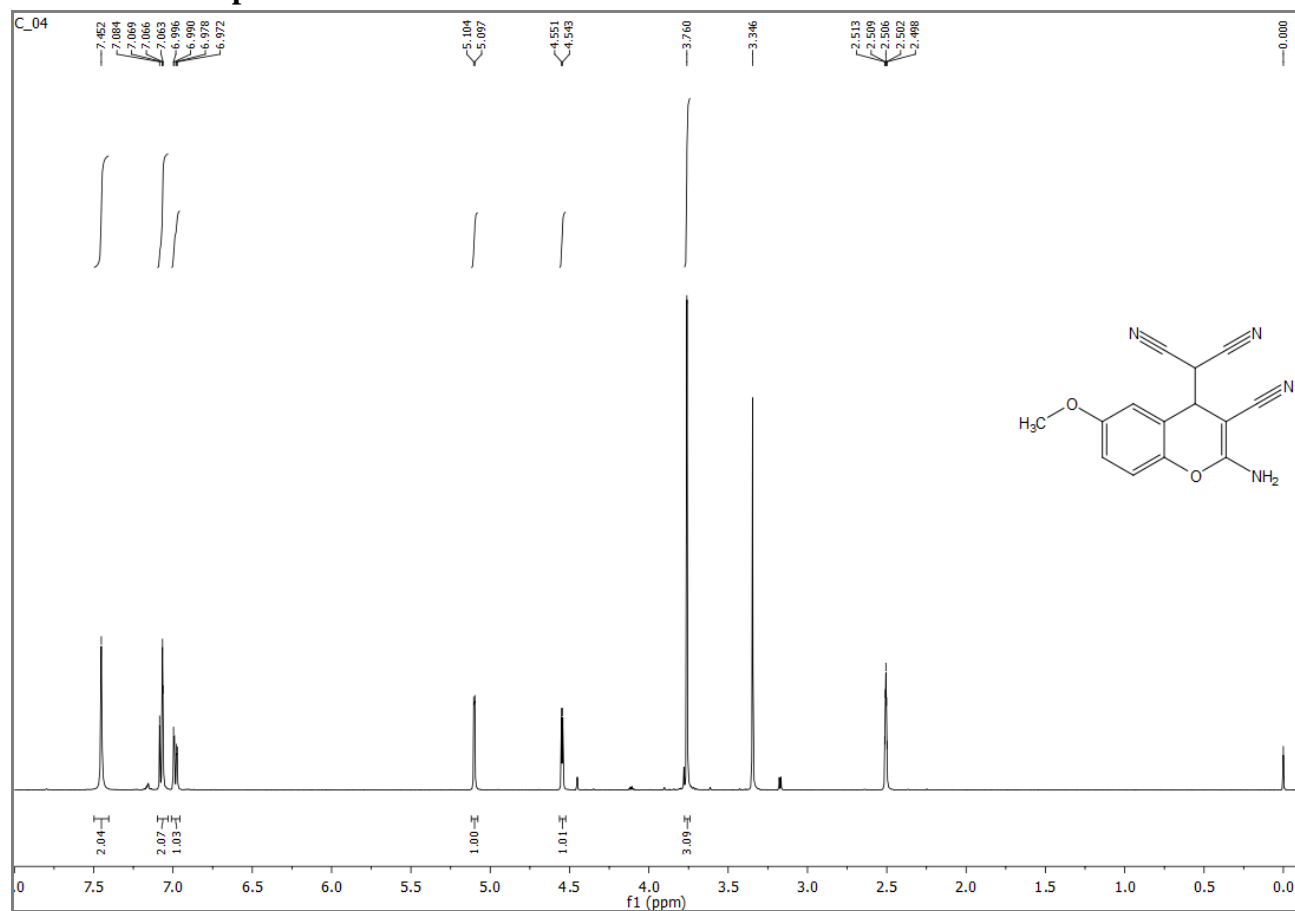

### <sup>1</sup>H NMR of Compound 3e

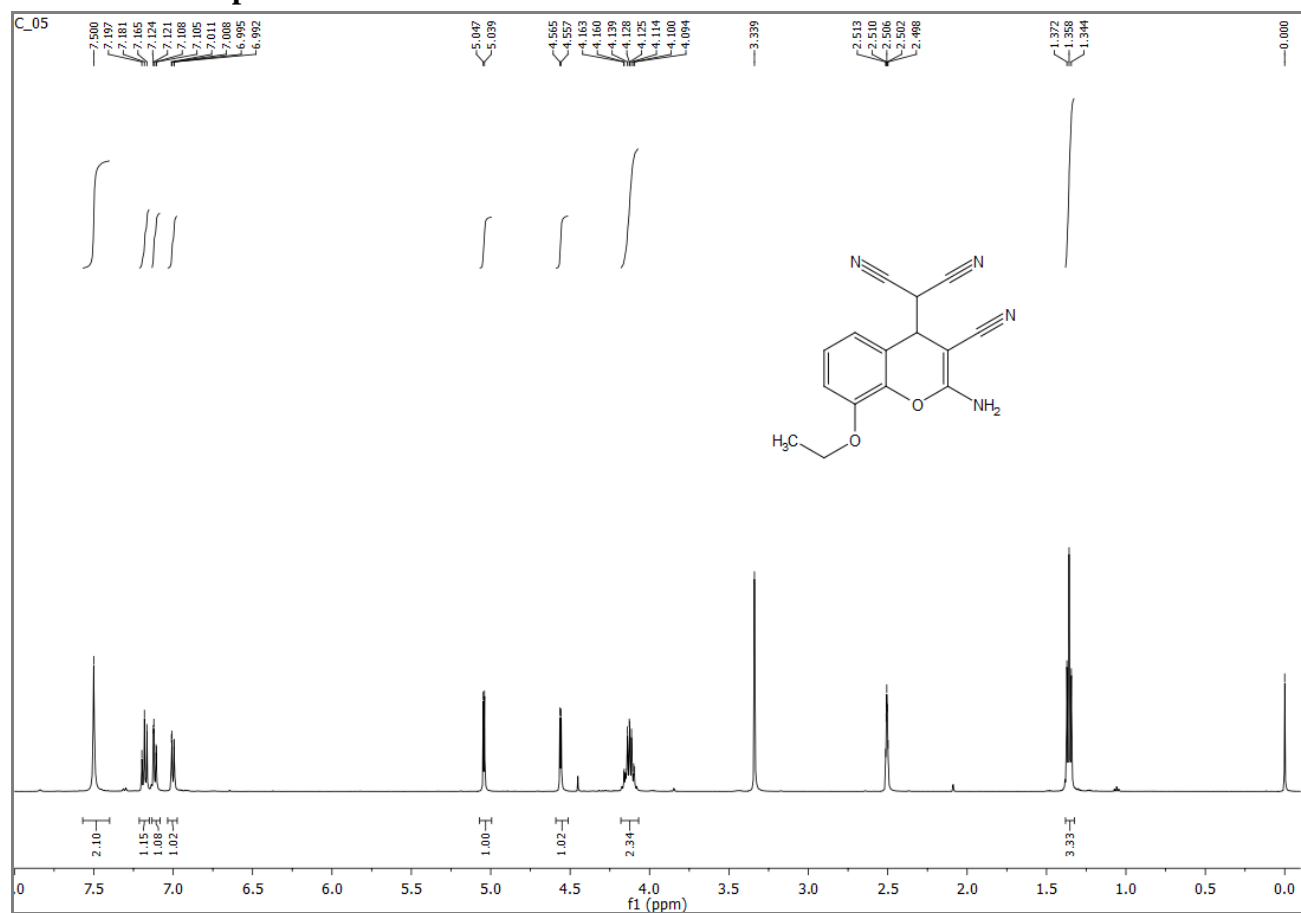

### <sup>13</sup>C NMR of Compound 3e

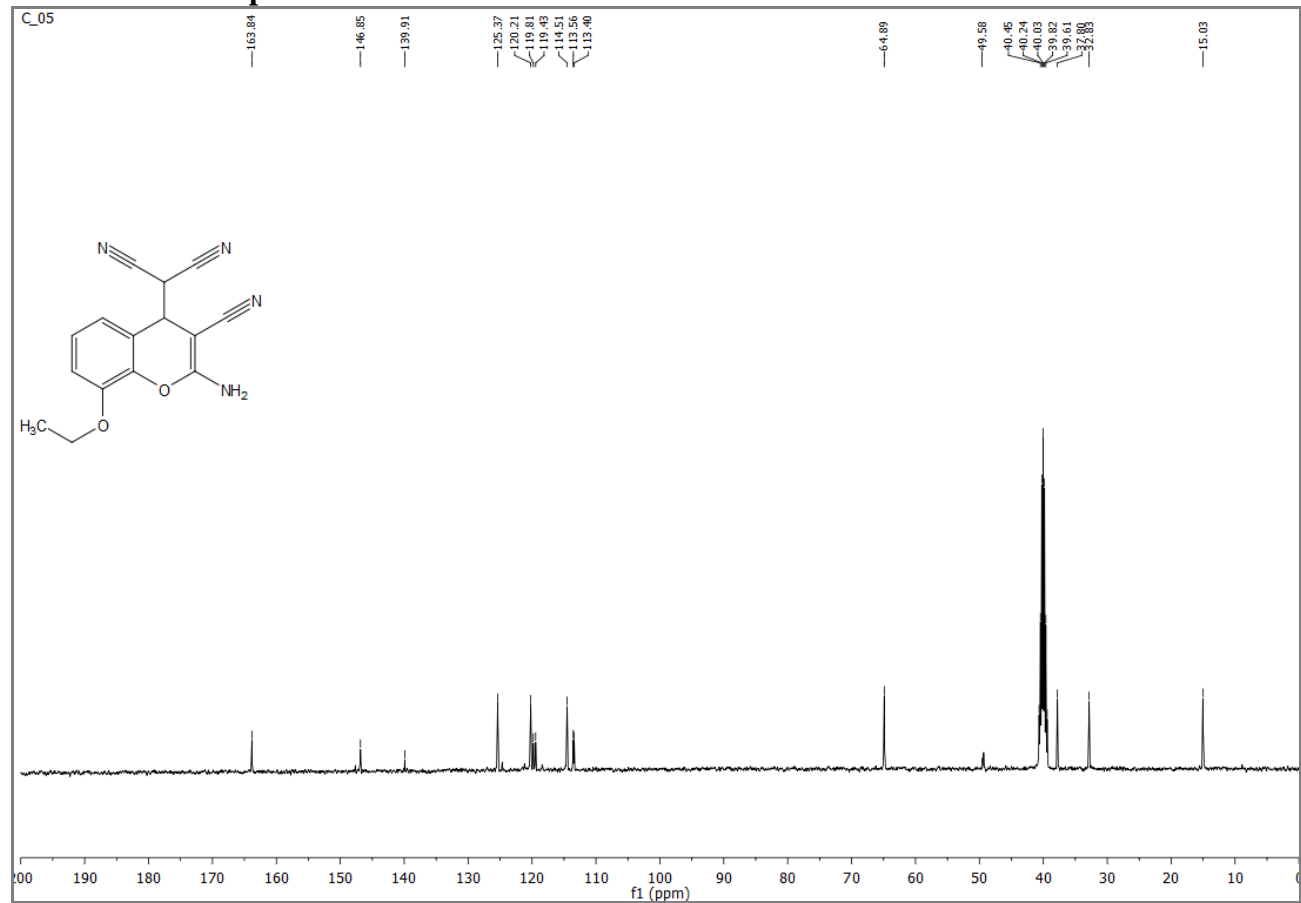

### <sup>1</sup>H NMR of Compound 3f

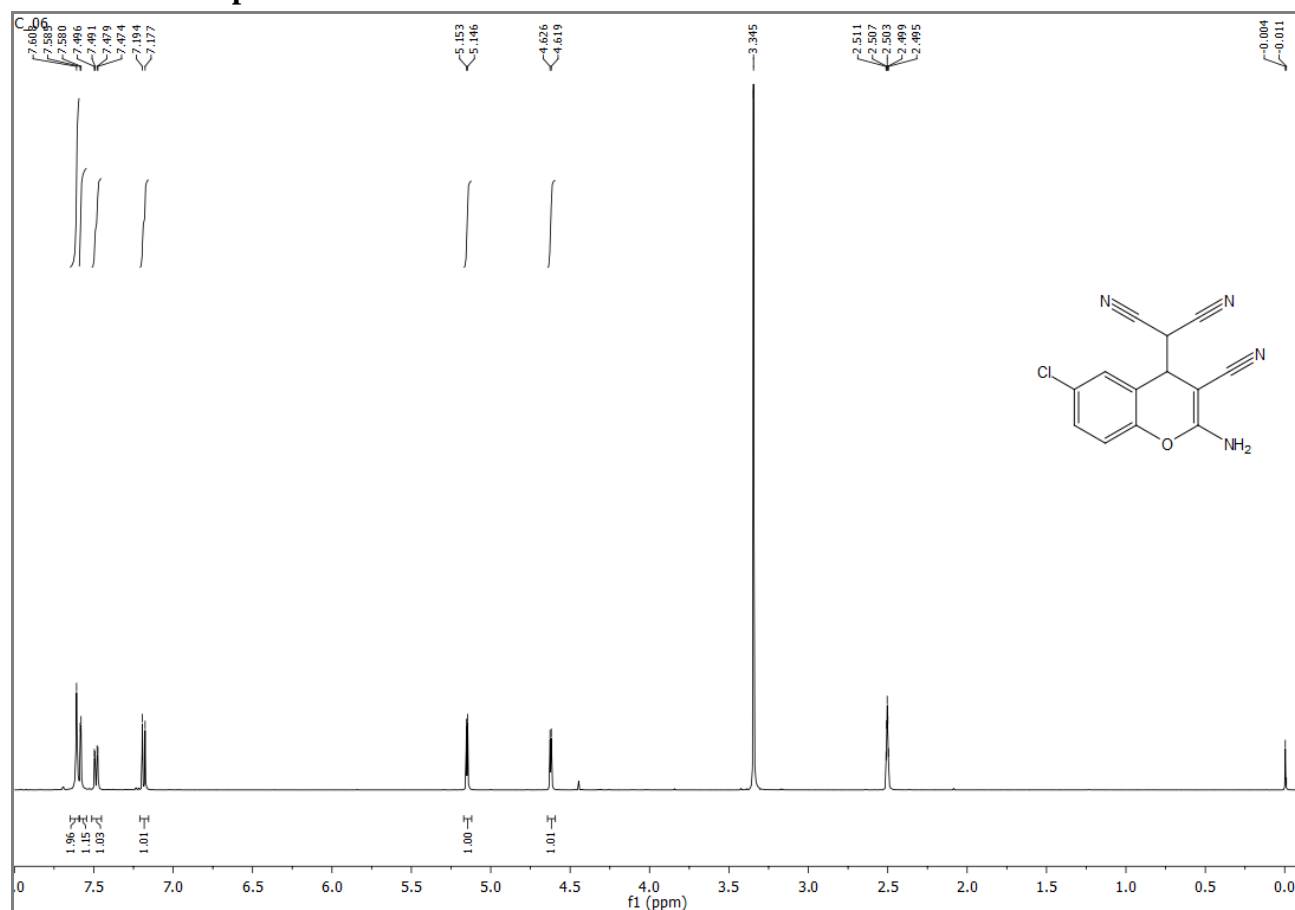

### <sup>1</sup>H NMR of Compound 3g

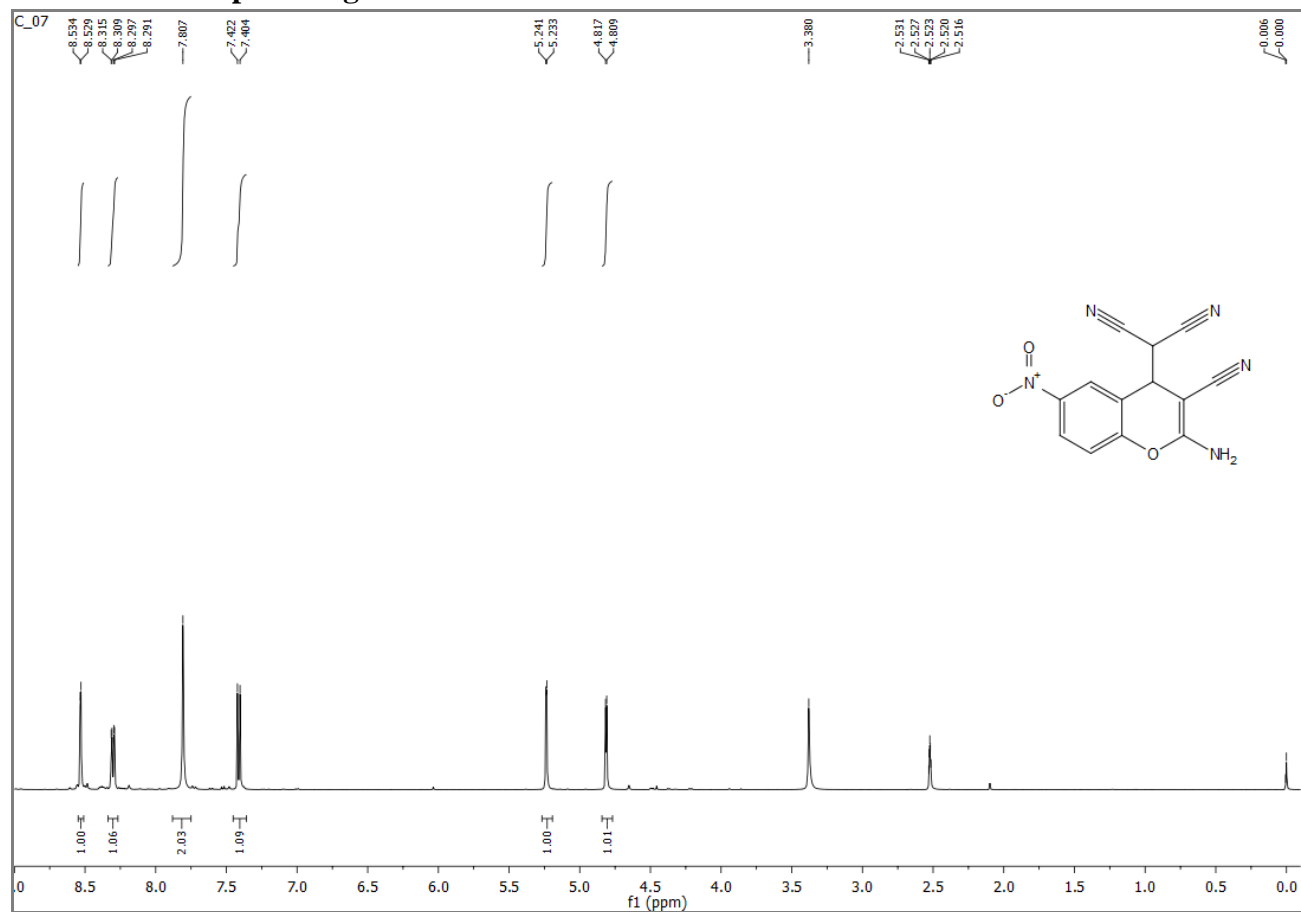

### <sup>1</sup>H NMR of Compound 3h

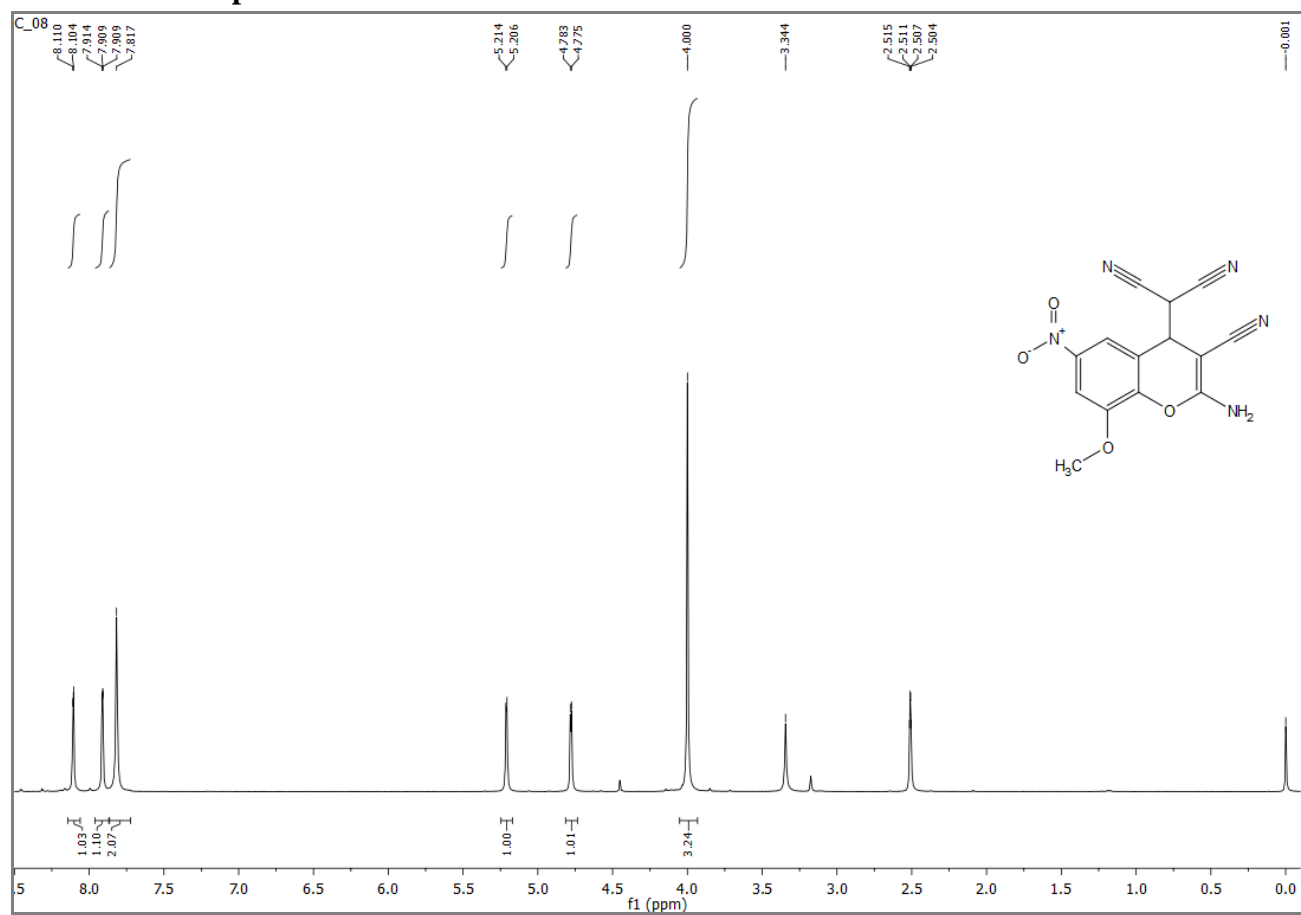

### <sup>13</sup>C NMR of Compound 3h

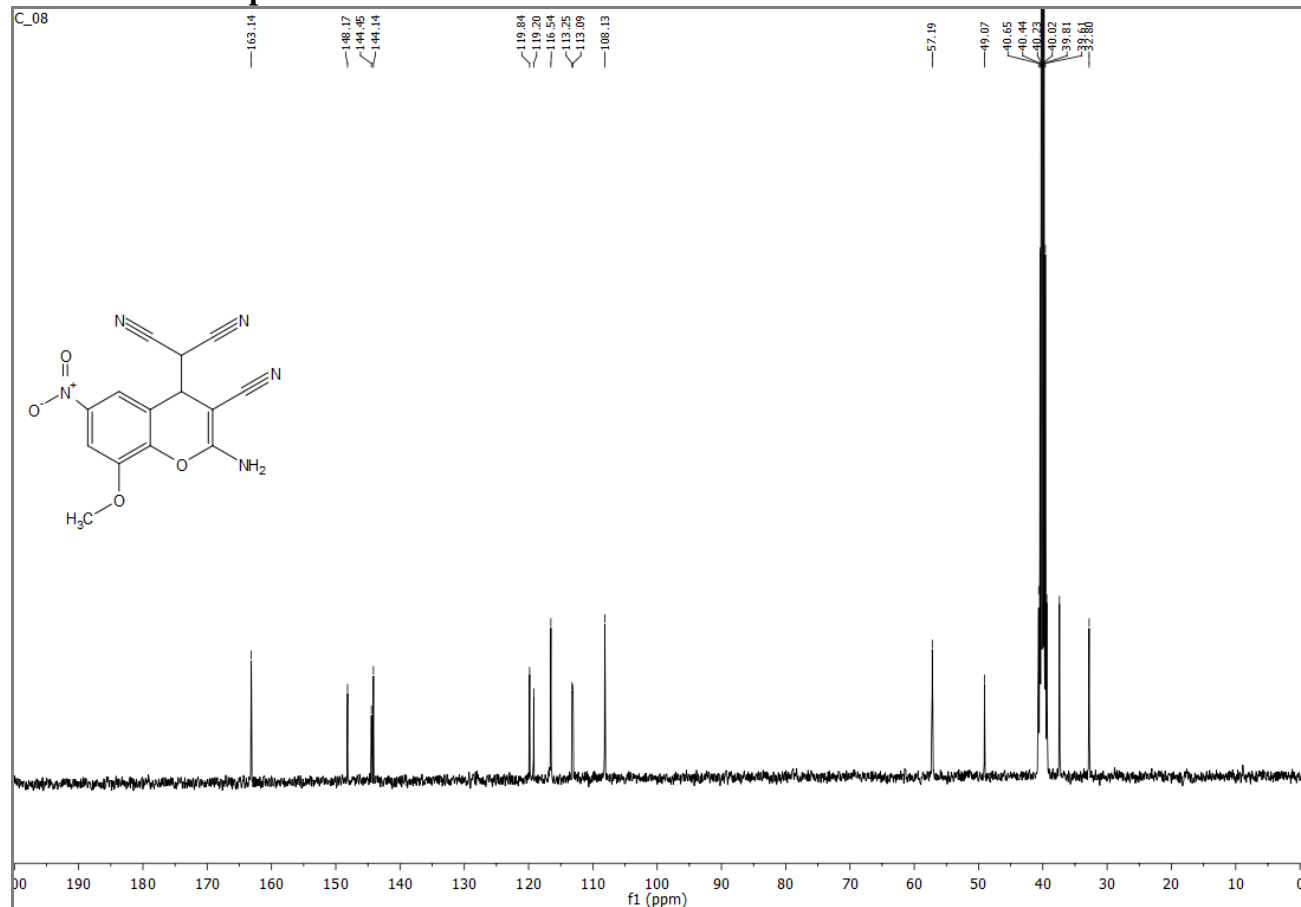

### <sup>1</sup>H NMR of Compound 3i

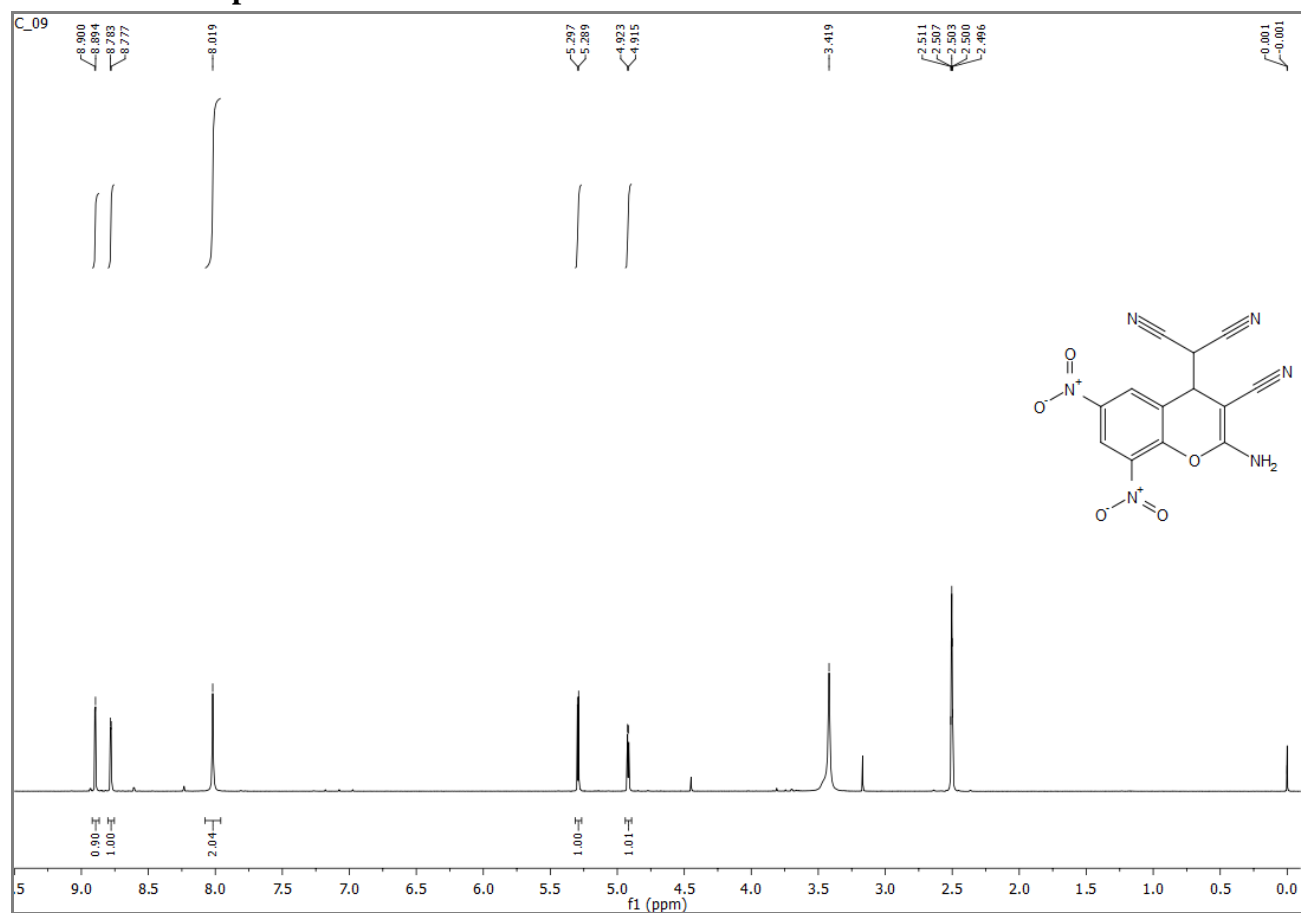

### <sup>13</sup>C NMR of Compound 3i

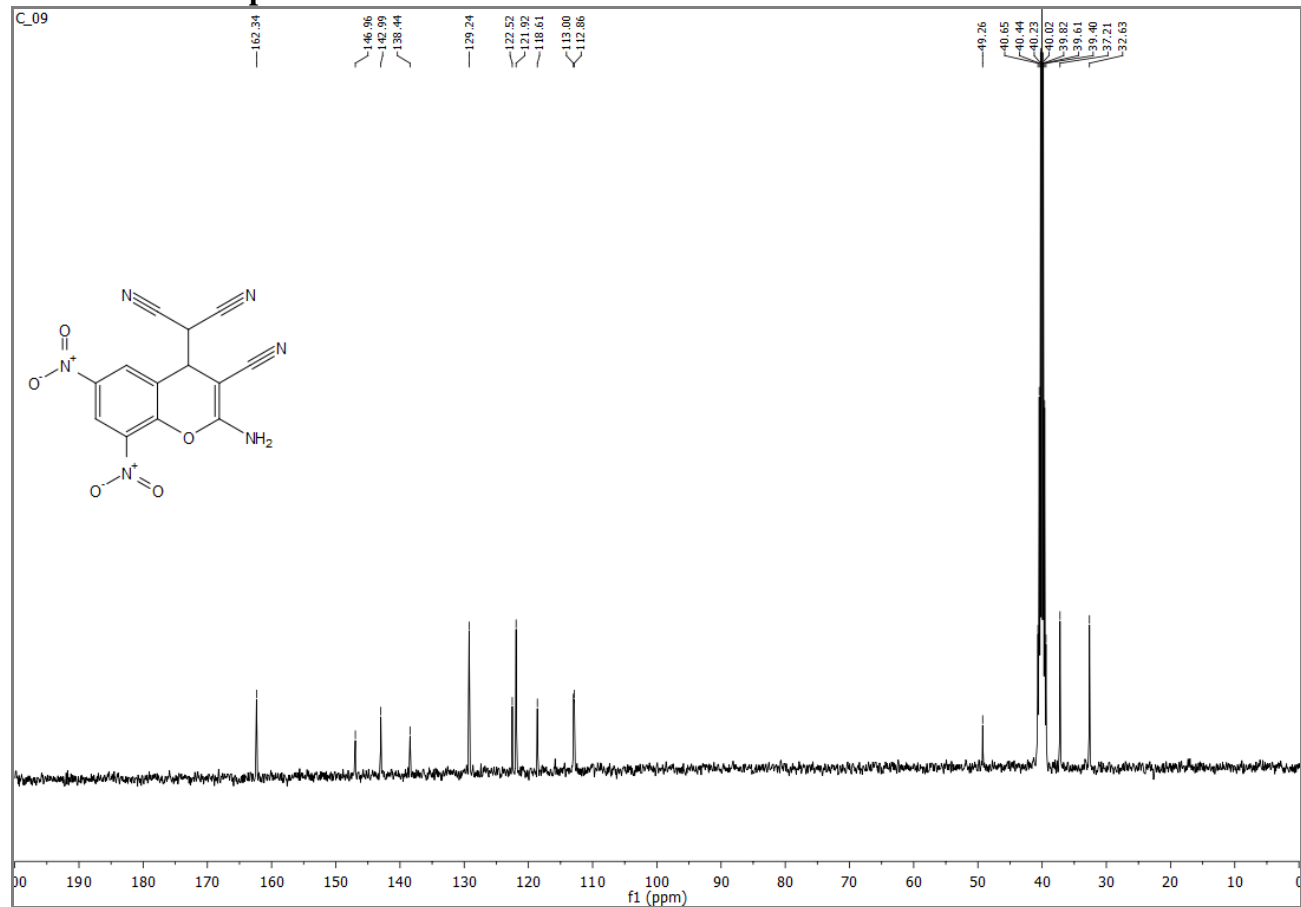

### <sup>1</sup>H NMR of Compound 3j

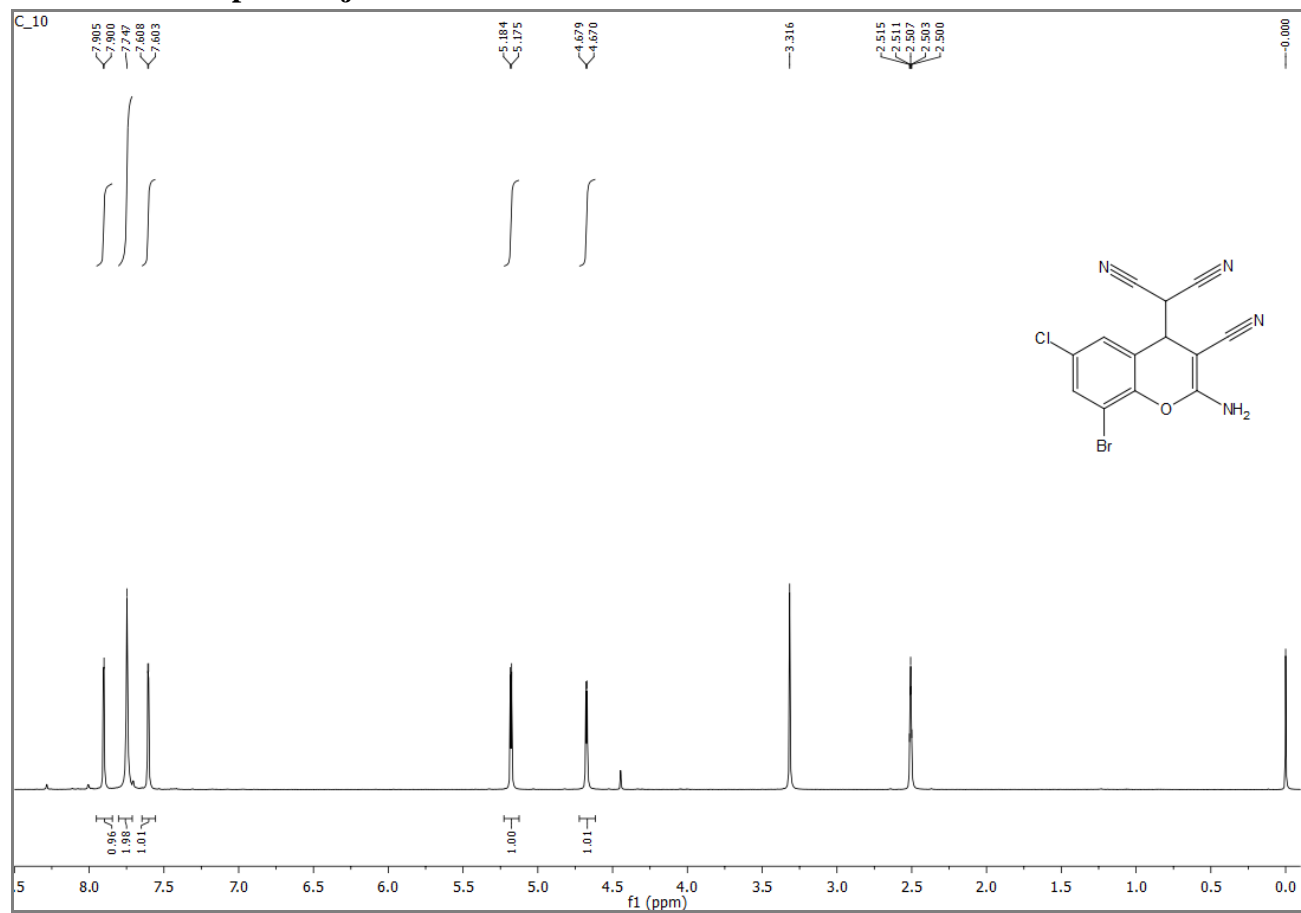

### <sup>13</sup>C NMR of Compound 3j

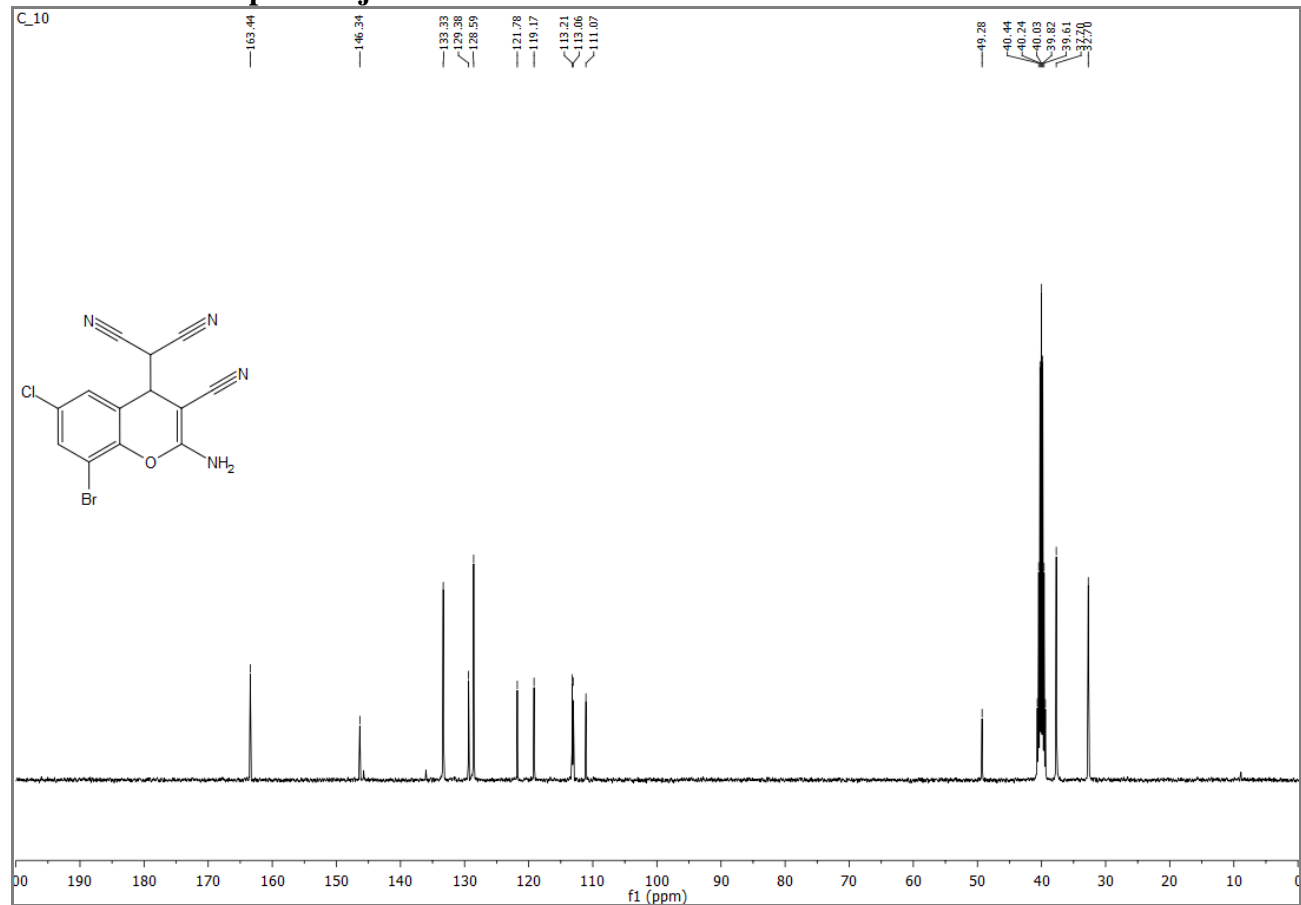

### <sup>1</sup>H NMR of Compound 3k

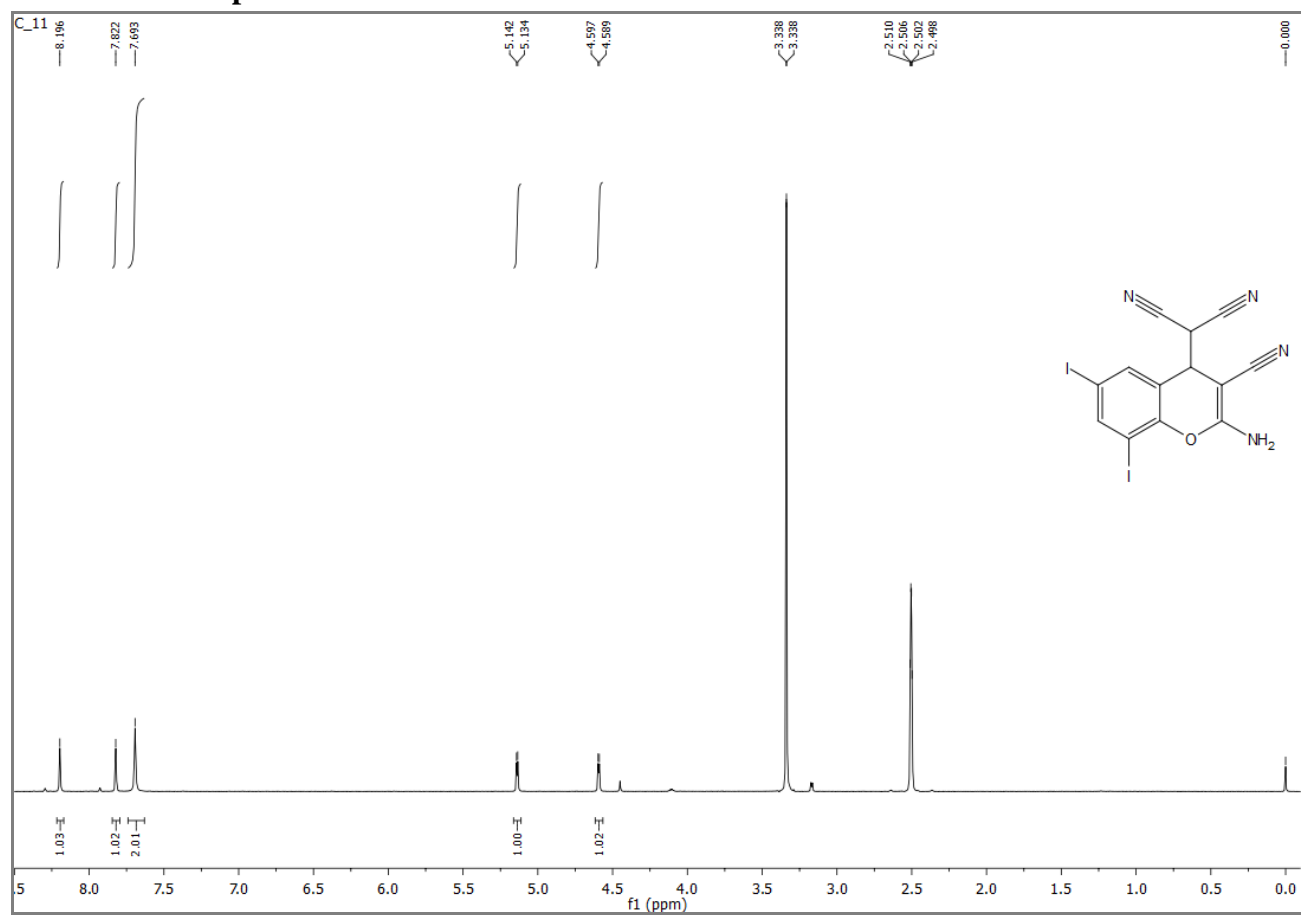

### <sup>13</sup>C NMR of Compound 3k

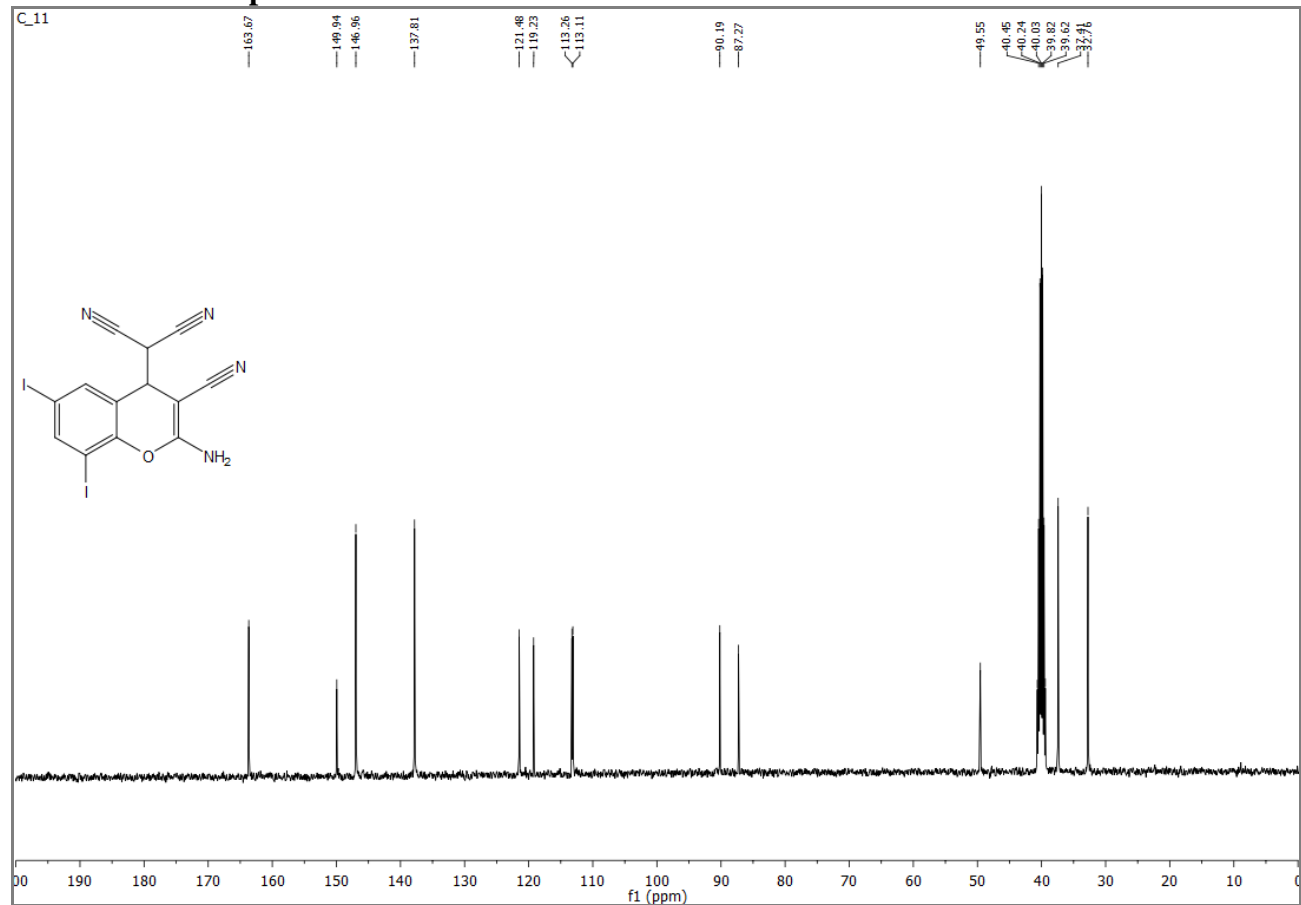



### <sup>1</sup>H NMR of Compound 4a

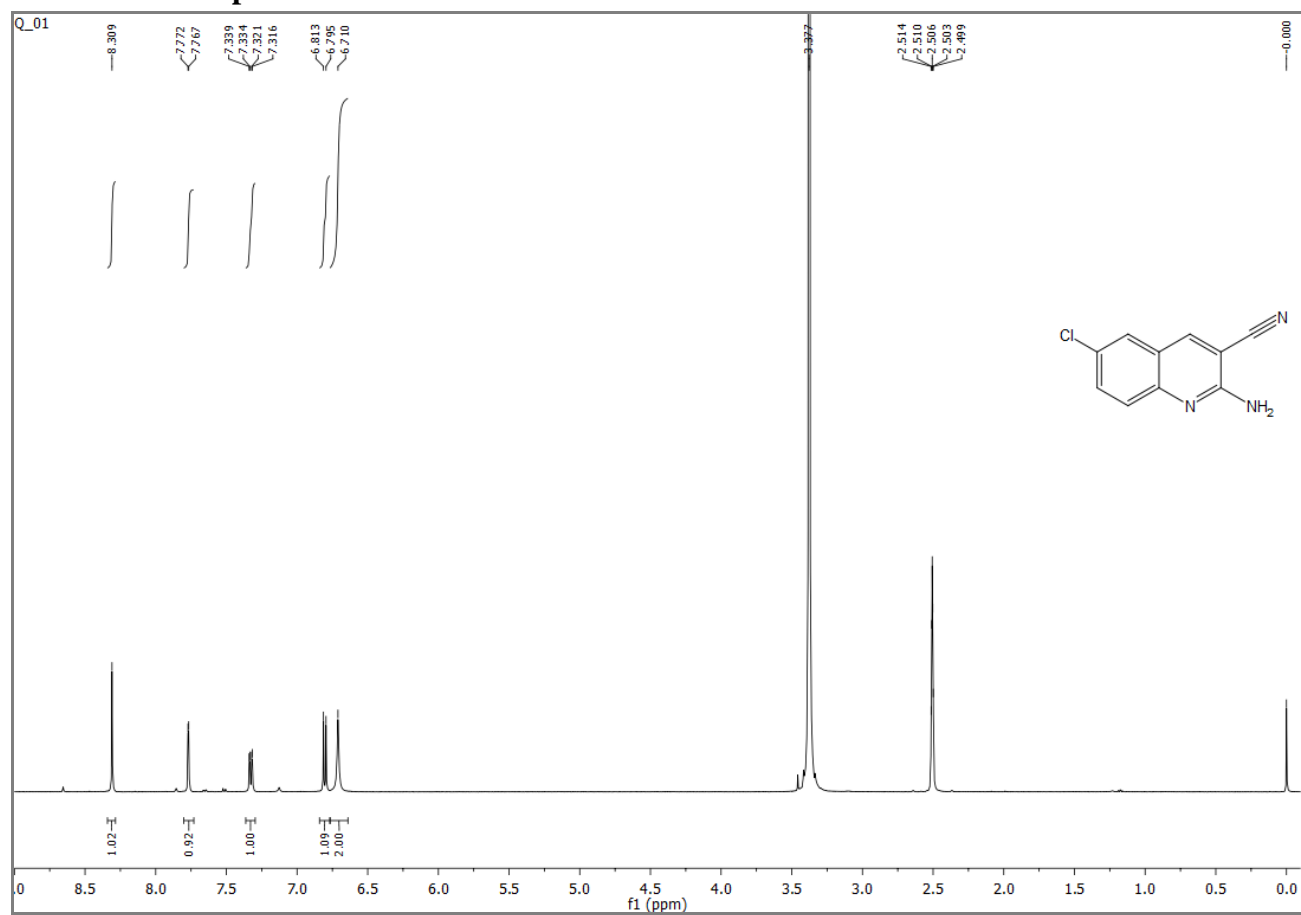

### <sup>13</sup>C NMR of Compound 4a

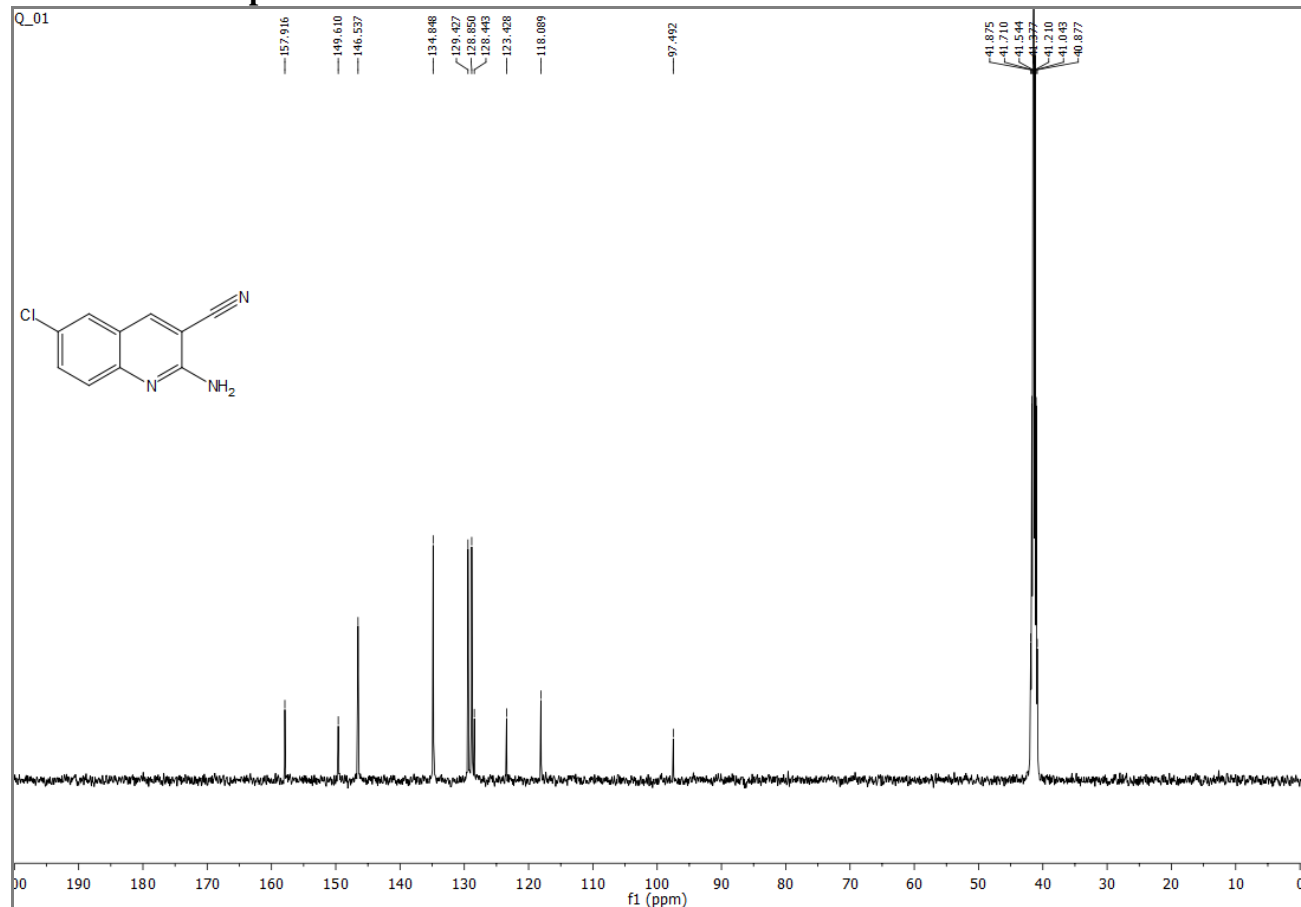

### <sup>1</sup>H NMR of Compound 4b

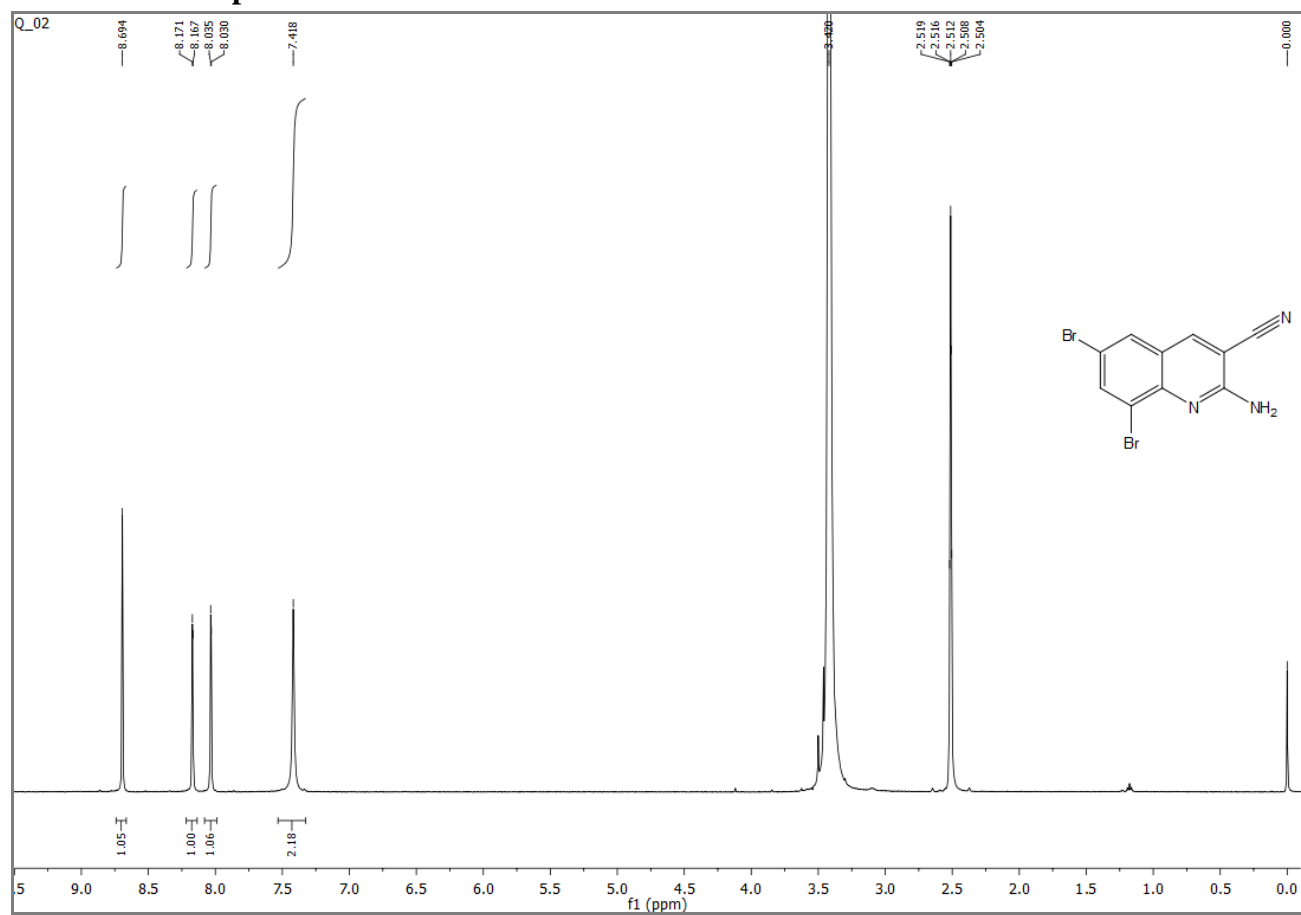

### <sup>13</sup>C NMR of Compound 4b

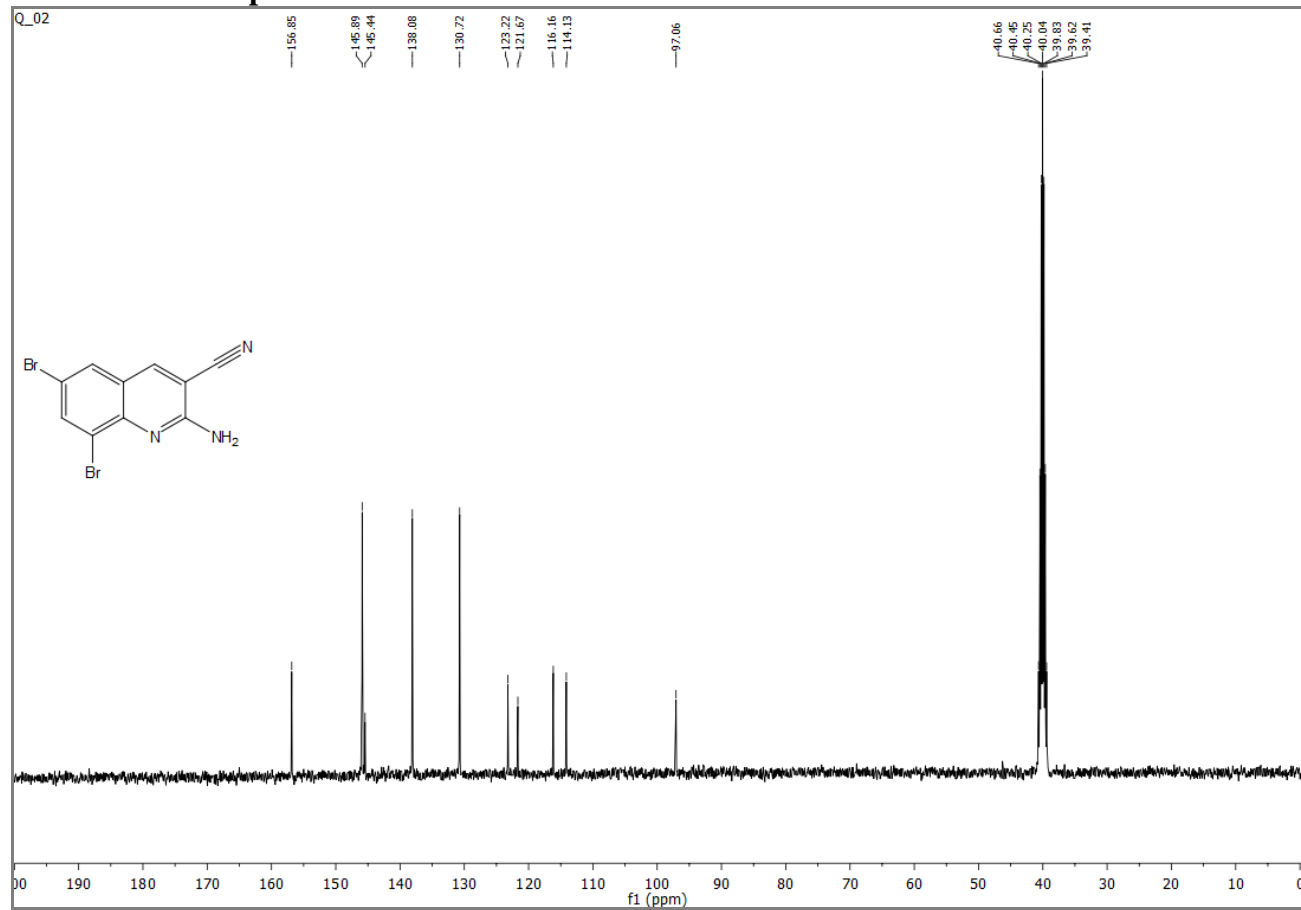

### <sup>1</sup>H NMR of Compound 4c

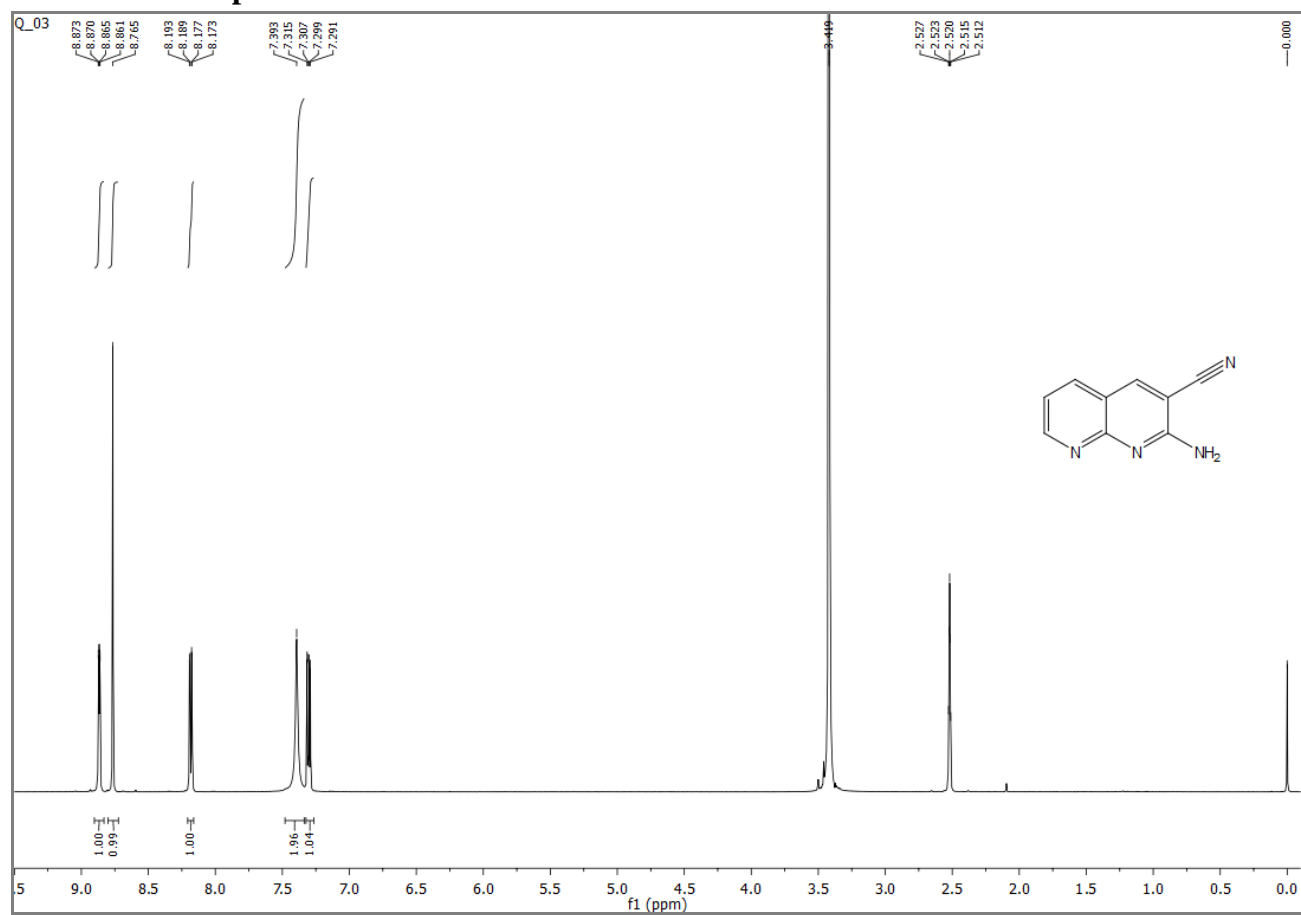

### <sup>13</sup>C NMR of Compound 4b

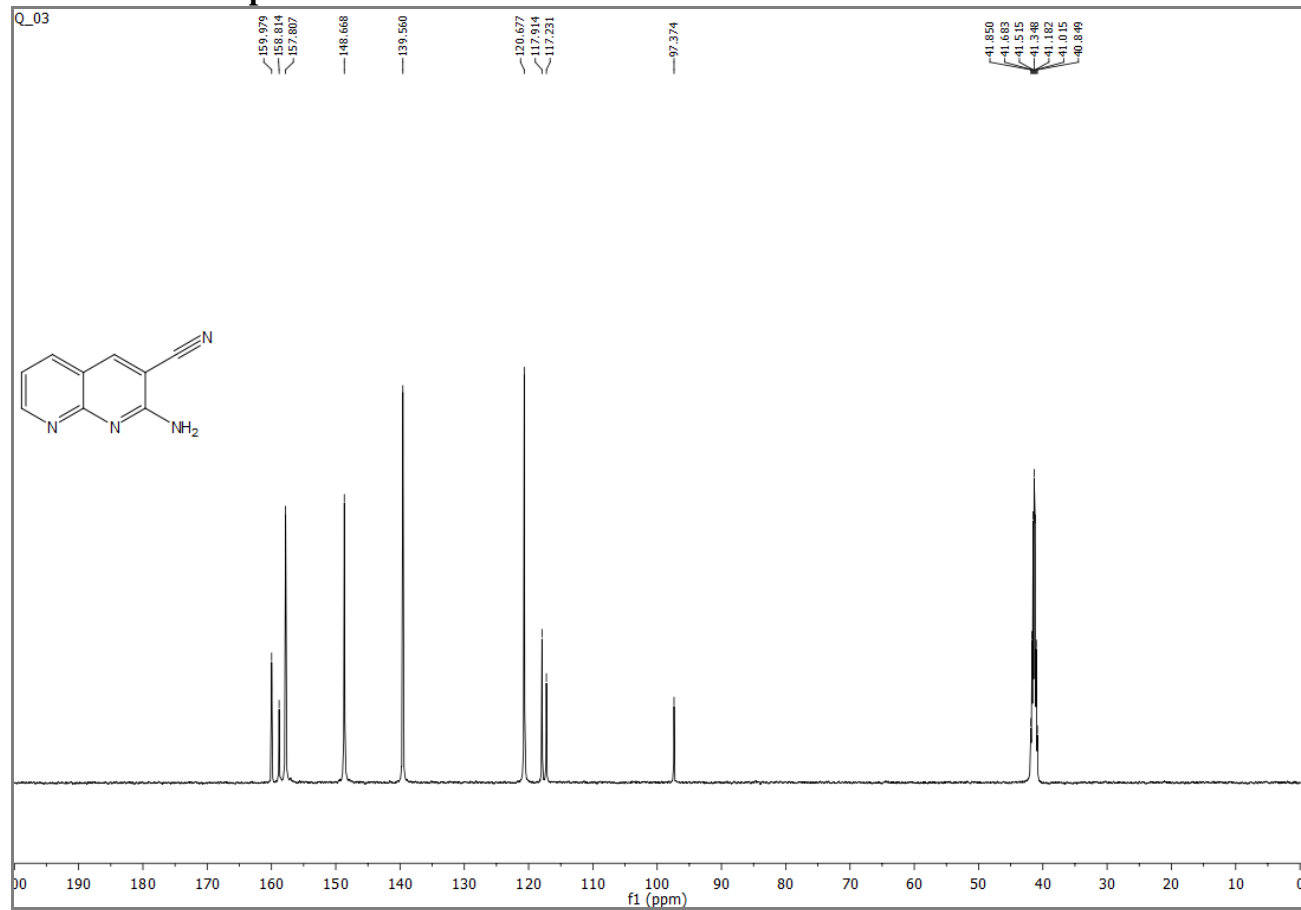

Supplement: c2ra21849f.pdf [file c2ra21849f.pdf]
